1 **Palmitoylethanolamide shows limited efficacy in controlling cerebral cryptococcosis *in vivo*.**

2  
3  
4  
5  
6  
7  
8  
9  
10  
11  
12  
13  
14  
15  
16  
17  
18  
19  
20  
21  
22  
23  
24  
25  
26  
27  
28  
29  
30  
31  
32  
33  
34  
35  
36  
37

Melissa E. Munzen<sup>1</sup>, Marta Reguera-Gomez<sup>1</sup>, Mohamed F. Hamed<sup>1,2</sup>, Vanessa Enriquez<sup>1</sup>,  
Claudia L. Charles-Nino<sup>1</sup>, Michael R. Dores<sup>3</sup>, Karina Alviña<sup>4,5</sup>, and Luis R. Martinez<sup>1,5-7\*</sup>

<sup>1</sup>Department of Oral Biology, University of Florida College of Dentistry, Gainesville, FL, USA;

<sup>2</sup>Department of Pathology, Faculty of Veterinary Medicine, Mansoura University, Mansoura,

Egypt; <sup>3</sup>Department of Biology, Hofstra University, Hempstead, NY, USA; <sup>4</sup>Department of

Neuroscience, University of Florida, Gainesville, FL, USA; <sup>5</sup>Center for Translational Research

in Neurodegenerative Disease, <sup>6</sup>Center for Immunology and Transplantation, and <sup>7</sup>Emerging

Pathogens Institute, University of Florida, Gainesville, FL, USA.

**Running Title:** PEA has limited efficacy against *C. neoformans* brain infection.

Abstract: 193 words/ Text: 4,533 words/ Figures: 7/ References: 56

\*To whom correspondence should be addressed:

Luis R. Martinez

University of Florida College of Dentistry

Department of Oral Biology

1395 Center Drive, DG-48

P.O. Box 100424

Gainesville, FL 32610

E-mail: LMartinez@dental.ufl.edu

**CONFLICT OF INTEREST:** The authors declare no conflict of interest.

38 **ABSTRACT**

39 *Cryptococcus neoformans* (*Cn*) is an encapsulated neurotropic fungal pathogen and the causative  
40 agent of cryptococcal meningoencephalitis (CME) in humans. Recommended treatment for CME  
41 is Amphotericin B (AmpB) and 5-fluorocytosine (5-FC). Though effective, AmpB has displayed  
42 numerous adverse side effects due to its potency and nephrotoxicity, prompting investigation  
43 into alternative treatments. Palmitoylethanolamide (PEA) is an immunomodulatory compound  
44 capable of promoting neuroprotection and reducing inflammation. To investigate the efficacy of  
45 PEA as a therapeutic alternative for CME, we intracerebrally infected mice with *Cn* and treated  
46 them with PEA or AmpB alone or in combination. Our results demonstrate that PEA alone does  
47 not significantly prolong survival nor reduce fungal burden, but when combined with AmpB,  
48 PEA exerts an additive effect and promotes both survivability and fungal clearance. However,  
49 we compared this combination to traditional AmpB and 5-FC treatment in a survivability study  
50 and observed lower efficacy. Overall, our study revealed that PEA alone is not effective as an  
51 antifungal agent in the treatment of CME. Importantly, we describe the therapeutic capability of  
52 PEA in the context of *Cn* infection and show that its immunomodulatory properties may confer  
53 limited protection when combined with an effective fungicidal agent.

54

55 **KEYWORDS:** amphotericin B, *Cryptococcus neoformans*, fungal brain infection,  
56 meningoencephalitis, microglia, palmitoylethanolamide, 5-fluorocytosine

57

58

59

60

## 61 INTRODUCTION

62 *Cryptococcus neoformans* (*Cn*) is an encapsulated neurotropic fungal pathogen and the  
63 causative agent of cryptococcosis in humans. *Cn* causes opportunistic disease in HIV-infected  
64 individuals due to low counts of CD4<sup>+</sup> T cells, with this mycosis accounting for approximately  
65 15 to 19% of AIDS-related deaths (1, 2). Cryptococcal meningoencephalitis (CME) is the most  
66 severe manifestation of the disease and results in an estimated 181,100 deaths annually  
67 worldwide. CME is a major cause of death in sub-Saharan Africa, where 2.5 million individuals  
68 are positive for HIV, over 58% of the global HIV-positive population (3). In fact, sub-Saharan  
69 Africa carries an estimated 73% of the global deaths related to CME annually (2). Despite the  
70 efficacy of and increasing accessibility to antifungal therapy, the high incidence of death from  
71 cryptococcal infection is associated with low adherence to antiretroviral therapy (4), as well as  
72 the lack of licensed and available treatment options (5).

73 The World Health Organization places cryptococcosis as a high priority mycosis and  
74 recommends a combination of amphotericin B (AmpB) and 5-fluorocytosine (5-FC), followed by  
75 fluconazole as the therapeutic management of CME in severely immunosuppressed individuals  
76 (6). There are limitations to this treatment regimen, particularly with AmpB being highly toxic  
77 causing nephrotoxicity, phlebitis, hypokalaemia, and anaemia (7), often requiring hospitalization  
78 (8), and the high costs and limited accessibility of 5-FC (9). Various formulations of AmpB have  
79 been tested, such as single-dose liposomal AmpB (10), which has shown similar efficacy to  
80 conventional AmpB with fewer complications, and AmpB colloidal dispersion (11). Different  
81 combinations of antifungal therapies with AmpB have also been reviewed, such as tamoxifen  
82 (12), but fungal clearance and recovery rates have not been as effective.

83 Palmitoylethanolamide (PEA) is an endogenous lipid compound capable of controlling  
84 and reducing neuroinflammation (13, 14). PEA downregulates the expression of inducible nitric  
85 oxide synthase and NF- $\kappa$ B nuclear translocation through interaction with cellular receptors,  
86 notably the peroxisome-proliferator-activated receptor alpha, present in many cell types  
87 including microglia (15). Modulation of microglial phenotypes to promote phagocytosis and  
88 migration have been observed with PEA treatment (16, 17), as well as anti-inflammatory effects,  
89 neuroprotection, reduced apoptosis, and prolonged neuronal survival (18-20). PEA enhances  
90 survival in mice infected with *Escherichia coli* by modulating inflammation and stimulating  
91 bacterial phagocytosis by microglia (21). Interestingly, PEA also acts on several molecular  
92 targets both in the central and peripheral nervous systems, making it an attractive therapeutic  
93 agent for many central nervous system-related diseases (22). In fact, a clinical trial in the 1970s  
94 in the former Czechoslovakia involving 3,600 patients demonstrated that PEA had no adverse  
95 effects at daily doses of 600 to 1,800 mg (23, 24).

96 The incidence of CME and limited availability of accessible, safe, and effective  
97 treatments warrant further investigation into other potential therapeutic agents. Hence, in this  
98 study, we investigated the efficacy of PEA alone or combined with other commonly used  
99 antifungal drugs (e.g., AmpB and 5-FC) during *Cn* brain infection. Using a stereotaxic model of  
100 intracerebral (i.c.) mouse infection we evaluated the potential of PEA as a candidate for the  
101 clinical management of CME.

102

## 103 **RESULTS**

104 **AmpB and PEA combination extend the survival of C57BL/6 mice i.c.-infected with *Cn*.** We  
105 first assessed the impact of PEA alone or combined with AmpB in combating cerebral

106 cryptococcosis (Fig. 1). Using a stereotaxic apparatus (Fig. 1A), we i.c.-infected  $10^4$  *Cn* strain  
107 H99 cells into the mouse striatum ( $n = 7$  mice per group, 6-8 weeks old, female), following the  
108 brain coordinates described previously (25). The striatum is a region in the basal ganglia of the  
109 brain that coordinates multiple aspects of cognition and motor function. We used it as the site of  
110 infection because this brain region is frequently affected in patients with CME (26) with  
111 cryptococcoma formation around the Virchow-Robin spaces (i.e., perivascular fluid-filled  
112 cavities that surround perforating blood vessels in the brain parenchyma) (27). One day post-  
113 infection (dpi), sterile saline (untreated), minocycline (0.5 mg/kg/d; an inhibitor of microglia  
114 activation), PEA (0.5 mg/kg/d), AmpB (3 mg/kg/d), or a combination of AmpB (3 mg/kg/d) +  
115 PEA (0.5 mg/kg/d) were administered via intraperitoneal injection (i.p.) in different groups of  
116 mice followed by every other day treatment for 28-dpi. The survivability of the untreated and  
117 treated *Cn*-infected mice was closely monitored throughout the duration of the protocol (Fig.  
118 1B). On average but not statistically significant, PEA-treated mice that developed  
119 neurocryptococcosis survived longer (median: 13-dpi) than those in the untreated (median: 11-  
120 dpi) and minocycline-treated (median: 10-dpi) groups. Similarly, AmpB-treated animals showed  
121 much longer survival trend (median: 18-dpi) than PEA-treated mice, although this trend was not  
122 statistically significant. Interestingly, *Cn*-infected mice treated with combination of AmpB and  
123 PEA survived the longest (median: 26-dpi) with 3 out of 7 mice (approximately 42.9%) reaching  
124 to the end of the experiment (28-dpi; vs. untreated,  $P < 0.001$ ; minocycline,  $P < 0.003$ ; AmpB,  
125 not significant or ns; PEA,  $P < 0.002$ ). In this regard, only one mouse in the AmpB group  
126 survived the whole experiment whereas all the untreated, minocycline-treated, and PEA-treated  
127 animals died by 15-, 24-, and 18-dpi, respectively. Clinical observations resulting from *Cn*  
128 infection included respiratory distress, neurological impairment, seizures, loss of mobility, and

129 particularly, weight loss, which was a clear indicator of disease progression and mortality (Fig.  
130 1C). These results indicate that while PEA alone had limited effect in extending the life of mice  
131 that developed cerebral cryptococcosis, when combined with AmpB, PEA showed a  
132 considerable additive effect.

133

#### 134 **AmpB and PEA combination significantly reduces fungal burden in *Cn*-infected brains.**

135 Coronal brain tissue sections were stained with Periodic acid-Schiff to identify the morphology  
136 of *Cn* in the host tissue during infection (Fig. 2). Untreated *Cn*-infected brains exhibit red-stained  
137 cryptococci (arrows) in the ventricular and the caudate nucleus (Fig. 2A). Minocycline- and  
138 PEA-treated brains displayed yeast cells accumulated in the margin of the cryptococcoma  
139 adhering to striatal tissue. Notably, brain tissue excised from mice treated with AmpB show  
140 minimal fungal colonization. *Cn*-infected mice treated with combination of PEA and AmpB  
141 displayed fungal cells in the lumen of the lateral ventricle. Mice i.c.-challenged with *Cn* [ $n = 6$   
142 mice per group; 6 colony forming unit (CFU) plates per animal were plotted] and treated with  
143 saline (untreated), minocycline, AmpB, PEA, or combination AmpB + PEA were evaluated for  
144 brain fungal load (Fig. 2B). There were no differences between the groups in fungal burden at 3-  
145 dpi. However, AmpB (mean:  $3.72 \times 10^6$  CFU/g tissue)- and AmpB + PEA (mean: 1 CFU/g  
146 tissue)-treated brains showed significantly lower fungal burden than untreated ( $9.14 \times 10^6$  CFU/g  
147 tissue;  $P < 0.0001$ ) or minocycline ( $8.04 \times 10^6$  CFU/g tissue;  $P < 0.0001$ )-treated brain tissue at  
148 7-dpi. The AmpB + PEA combination brains exhibited the lowest CFU number reduction of all  
149 the groups at the chosen dilutions. There were no differences in fungal burden between  
150 untreated, minocycline-and PEA-treated mice. Overall, our findings indicate that PEA is not  
151 fungicidal, although it enhances cryptococcal killing when combined with AmpB.

152

153 **AmpB and PEA combination stimulate strong glial cell responses around the brain region**

154 **of infection.** We have previously shown that *Cn* forms cryptococcomas in mouse striatal tissue

155 after i.c. infection, mimicking CME in humans, particularly those cases with brain parenchyma

156 involvement (28). Thus, we examined morphological changes in all saline (untreated),

157 minocycline, AmpB, PEA, or AmpB + PEA treated *Cn*-infected mice. Brain tissue was

158 processed for histology and sections were stained with hematoxylin & eosin, which allows us to

159 observe tissue morphology. All treatment groups display encephalomalacia or cryptococcoma

160 formation in the striatum (Fig. 3). Untreated brain tissue showed extensive necrosis that

161 expanded throughout the basal ganglia (e.g., striatum, globus pallidus, and caudate nucleus; Fig.

162 3, top panels). Microgliosis and *Cn*-induced necrosis (red arrow) were also evident around the

163 border of the cryptococcoma. In the minocycline-treated brains, extensive encephalomalacia that

164 extended to the overlying cerebral cortex was observed (Fig 3, second panel row from the top).

165 In addition, *Cn* invaded the tissue surrounding the cryptococcoma causing ischemic neuronal

166 necrosis (blue arrow) and weak microglial response (red arrow), which is characteristic of GXM

167 accumulation and the direct negative effect of minocycline in these glial cells (25). Interestingly,

168 tissue from AmpB-treated mice evinced marked microgliosis (blue arrow) and astrocytic

169 response (red arrow) in tissue adjacent to the cryptococcoma or encephalomalacia (middle row

170 panels), while tissue from PEA-treated mice displayed noticeable microgliosis (red arrow) and

171 evident swollen endothelial cells (blue arrow). Lastly, *Cn*-infected mice and treated with

172 combination of AmpB + PEA exhibited microgliosis (red arrow) around the margin of the

173 cryptococcoma (Fig. 3, lower panels). In summary, analysis of our histological data demonstrate

174 that AmpB + PEA stimulate robust glial cell responses that may be critical to combat *Cn* brain  
175 infection.

176

177 **AmpB and PEA combination reduces *Cn* GXM released in brain tissue.** *Cn* GXM is  
178 abundantly secreted during infection resulting in immunosuppressive effects for the host. Hence,  
179 we examined the impact of these various drug treatments on GXM accumulation in tissue during  
180 cerebral cryptococcosis (Fig. 4). GXM was red-pink stained in brain tissue using the specific  
181 monoclonal antibody (mAb) 18B7 (Fig. 4A). The GXM intensity in tissue sections was analyzed  
182 using NIH Image J color deconvolution tool software. Immunolabeling of untreated *Cn*-infected  
183 brain tissue evinced extensive GXM accumulation that diffused inside the lateral ventricle.  
184 Minocycline-injected animals displayed GXM concentrated in the area of encephalomalacia that  
185 spread to surrounding brain tissue. In contrast, *Cn*-infected brains from PEA treated mice  
186 showed localized polysaccharide accumulation inside the cryptococcoma without dissemination  
187 to surrounding tissue (Fig. 4A, middle panels). Interestingly, AmpB-treated groups (either alone  
188 or in combination with PEA) demonstrated a significant reduction in GXM accumulation in  
189 brain tissue (Fig. 4A and B). Further, brains from mice treated with AmpB + PEA combination  
190 showed positive immunostaining exclusively in plug-like structures (arrow) formed and adhered  
191 to ependymal cells in the lateral ventricle, without brain parenchyma involvement (Fig. 4A,  
192 lower panels). Analysis of the intensity of GXM staining in brain tissue images from *Cn*-infected  
193 mice after the various drug treatments revealed that AmpB alone and in combination with PEA  
194 had significantly lower GXM intensity or accumulation in tissues than minocycline- ( $P < 0.05$ )  
195 and PEA-treated ( $P < 0.01$ ) groups (Fig. 4B). Our data show that AmpB regulates fungal



196 capsular polysaccharide release, which may have important implications for impacting the  
197 progression of neurocryptococcosis.

198

199 **PEA has no effect in reducing *Cn* capsular volume *in vivo*.** The capsule of *Cn* is the primary  
200 virulence factor of the fungus and is incredibly dynamic and responsive to changes in the  
201 microenvironment. Large capsule volume is correlated with a robust inflammatory response and  
202 respiratory distress (29). Also, capsular enlargement reduces phagocytosis and enhances *Cn*  
203 survival during infection (30). To validate our results indicating that AmpB treatment reduces *Cn*  
204 GXM released in brain tissue, we assessed the impact of the different drug treatments on  
205 capsular size and volume in brain tissue homogenates using India ink staining and light  
206 microscopy (Fig. 5A). Quantification of microscopic images ( $n = 3$  mice and  $\geq 200$  cells per  
207 group; Fig. 5B) confirmed that treatment with AmpB ( $1,208.2 \mu\text{m}^3$ ;  $P < 0.05$ ) and AmpB + PEA  
208 ( $1,259.9 \mu\text{m}^3$ ;  $P < 0.05$ ) significantly reduced *Cn* capsular volume compared to minocycline  
209 treatment ( $1,643.2 \mu\text{m}^3$ ). Surprisingly, no differences in capsular volume were observed between  
210 untreated ( $1,394.6 \mu\text{m}^3$ ), PEA ( $1,350.1 \mu\text{m}^3$ ), AmpB ( $1,208.2 \mu\text{m}^3$ ), and AmpB + PEA ( $1,259.9$   
211  $\mu\text{m}^3$ ). Our results suggest that AmpB, on average, has a negative effect on cryptococcal capsular  
212 production and release in brain tissue, thus, facilitating fungal clearance during infection.

213

214 **PEA causes similar microglia morphological changes than minocycline during *Cn* brain**  
215 **infection.** Microglia are the principal immune cell in the brain responsible for phagocytosis,  
216 immune cell recruitment, and communication via cytokine signaling (31). We recently reported  
217 that microglia can take diverse morphological phenotypes after *Cn* i.c.-infection, ramified,  
218 activated, phagocytic/amoeboid, dystrophic, or rod-shaped, which may be associated with

219 neurocryptococcosis progression and outcome (28). Therefore, we monitored the impact of each  
220 drug treatment on the phenotypic landscape of microglia during cryptococcal infection (Fig. 6).  
221 Microglia and GXM were immunolabeled using ionized calcium binding adaptor molecule-1  
222 (Iba-1; brown)- and 18B7 (pink-red)-binding mAbs, respectively (Fig. 6A). Images of each  
223 group treatment were visualized under the microscope and the microglia morphology  
224 documented as previously described (25). *Cn*-infected brains from untreated mice presented the  
225 following microglia phenotype distribution: activated (38.52%) > ramified (31.03%) > rod-  
226 shaped (15.46%) > phagocytic (11.59%) > dystrophic (3.4%) (Fig. 6B). Although minocycline  
227 treatment inhibited microglial activation (32.46%), this drug resulted in the highest percentage of  
228 phagocytic (42.8%) and dystrophic (9.58%) microglia and the lowest percentage of ramified  
229 (6.03%) microglia. In addition, brains from minocycline-treated mice had the second lowest  
230 percentage of rod-shaped (9.12%) microglia after AmpB-treated (8.46%) mice. Furthermore,  
231 AmpB-treatment resulted in the highest percentage of ramified (44.58%) microglia and the  
232 lowest percentage of activated (22.78%) microglia. Tissue from AmpB-treated mice also had  
233 20.93% and 3.25% of phagocytic and dystrophic microglia, respectively. The phenotypic profile  
234 of microglia in PEA-treated tissue was similar to those observed in the minocycline group  
235 including 39.32% phagocytic, 35.77% activated, 11.69% rod-shaped, 10.37% ramified, and  
236 2.85% dystrophic morphology. Moreover, AmpB + PEA-treated animals evinced similar  
237 microglia morphological patterns than untreated mice including 32.48% activated, 30.18%  
238 ramified, 14.86% rod-shaped, 20.18% phagocytic, and 2.29% dystrophic cells. Our findings  
239 suggest that *Cn* brain infection and different drug treatments causes phenotypic microglial  
240 alterations, which may have important consequences in their responses to fungal infection and  
241 clearance.

242  
243 **PEA and AmpB combination prolong i.c.-infected mouse survival, but with less efficacy to**  
244 **current standard of treatment.** Since AmpB and 5-FC are standard of treatment for individuals  
245 with CME, we compared the efficacy of PEA and AmpB combination and AmpB and 5-FC  
246 combination in extending *Cn*-infected mice survival (Fig. 7). On average, *Cn*-infected and  
247 AmpB + PEA-treated mice exhibited higher survivability (median: 20-dpi) relative to untreated  
248 (median: 12-dpi;  $P < 0.03$ ) and PEA + 5-FC (median: 14-dpi; trend but ns) animals (Fig. 7A).  
249 All untreated mice and PEA + 5-FC-treated groups died by 20-dpi. On the contrary, all mice  
250 infected with *Cn* and treated with AmpB + 5-FC survived (100%; vs. Untreated,  $P < 0.001$ ; PEA  
251 + 5-FC,  $P < 0.001$ ) whereas only 33% (2 out of 6) of the animals in the AmpB + PEA group ( $P <$   
252  $0.02$ ) survived for 28-dpi when the experiment was finalized. Body weight was monitored and  
253 was also a clear indicator of disease progression, with mortality being associated with 25%  
254 weight loss (Fig. 7B). These results show that while the combination of AmpB and PEA has  
255 positive effects in prolonging the life of mice with cerebral cryptococcosis, this effect is limited  
256 when compared with the efficacy of AmpB and 5-FC, the current standard of patient care.

257  
258 **DISCUSSION**

259 In this study, we demonstrated that PEA has limited effect in prolonging murine  
260 survivability upon direct brain infection with *Cn*. PEA is an immunomodulatory molecule, and  
261 its effects in extending mouse survival are related to the high activation of microglia in brain  
262 tissue that may aid in combating *Cn* infection. Our data show that 75% of microglia during *Cn*  
263 brain infection had an activated or phagocytic phenotype, which is critical for microbial  
264 clearance (32). For example, PEA increases microglia-mediated phagocytosis of bacteria without

265 inducing considerable inflammation (33), prevents rheumatic fever in susceptible children (34),  
266 and alters the course of influenza infection (24). However, its limitation in controlling *Cn*  
267 infection is because PEA has no direct effect in killing the fungus, reducing cryptococcoma  
268 formation, or decreasing fungal capsular volume and GXM secretion. Interestingly, PEA  
269 provides a substantial additive effect in combating cerebral cryptococcosis when combined with  
270 AmpB, which although toxic to the host, is a potent anti-cryptococcal agent, validating the  
271 critical importance of antimicrobial compounds in stimulating the host immunity. Combination  
272 of AmpB and PEA significantly and surprisingly decreased CFU numbers in *Cn* brain infected  
273 mice relative to all the other tested groups. Despite cryptococcoma formation in brain tissue of  
274 animals treated with AmpB and PEA combination, histopathology shows considerable  
275 microgliosis surrounding the brain-lesions, which is consistent with fungal clearance. Although  
276 i.c. infected mice treated with either AmpB or PEA elicited a strong glial response, it is plausible  
277 to consider that the AmpB and PEA combination provides an ideal balance between the potency  
278 of the antifungal drug and the lipid in killing the fungus. It is possible that PEA, by being a  
279 hydrophobic molecule, binds to the cell membrane ergosterol and serves as a vehicle in  
280 facilitating AmpB-mediated pore formation, killing the cell (35). These hypotheses are possible  
281 given that untreated and minocycline-treated brains showed moderate to weak glial responses  
282 and the untreated tissue exhibited ischemic necrosis, a manifestation reported in patients with  
283 CME (36, 37) and in this model of infection (25).

284 Untreated and minocycline- or PEA-treated *Cn* infected brains exhibited extensive  
285 accumulation of GXM in tissue. Additionally, cryptococci isolated from the brains of these  
286 groups showed large capsule size and volume relative to the AmpB-treated groups of animals.  
287 Enlargement of the capsule reduces phagocytosis during infection and dramatically enhances

288 virulence through oxidative stress resistance (30, 38). However, cryptococcal GXM  
289 accumulation showed different patterns with untreated and minocycline-treated tissue displaying  
290 polysaccharide intensity throughout tissue surrounding the cryptococcoma, whereas PEA-treated  
291 tissue exhibited higher GXM intensity inside of cryptococcomas or region of encephalomalacia.  
292 It is conceivable that differential glial cell responses (e.g., microglia and astrocytes) between  
293 these groups modulate the extension (e.g., untreated and minocycline) of GXM secretion from or  
294 containment (e.g., PEA) within the cryptococcoma. This is important because GXM inhibits T  
295 cell proliferation and reduces leukocyte recruitment needed for fungal clearance (39). Notably,  
296 AmpB and AmpB + PEA brains infected with the fungus evinced little or localized tissue  
297 secretion of GXM, respectively, which is likely due to the smaller capsular volume shown by the  
298 cryptococci and reduction in proliferation or killing of the fungi. AmpB reduces capsule size and  
299 serum polysaccharide, a described mechanism for this antifungal drug efficacy in cryptococcosis  
300 (40). Regardless of its high toxicity, AmpB has been used for the treatment of disseminated  
301 cryptococcal disease for over 70 years (41), and novel anti-cryptococcal compounds causing  
302 minimal toxicity are urgently needed.

303         Microglia are dynamic resident immune cells of the central nervous system that can  
304 modify their phenotype based on their responses to various pathological insults (42). Microglia  
305 engulf cryptococci, which can survive and replicate inside these cells (43), avoiding immune  
306 recognition. The morphological distribution of microglia in brain tissue after *Cn* brain infection  
307 and the various treatments differed among the groups and may have important predictor  
308 implications in reducing mortality. For instance, untreated *Cn*-infected brains showed the highest  
309 and lowest percentages of rod-shaped and phagocytic morphologies by microglia, respectively.  
310 Descriptions of rod-shaped microglia, which present elongated nuclei, few processes, and are

311 most notable in chronic neurological disorders, are scarce. The function of these cells remains  
312 under investigation, but it is believed that they may provide neuroprotection and trophic support  
313 (44, 45). Hypertrophic microglia are thought to be actively responding to injury (46, 47) and  
314 were most abundant in untreated *Cn*-infected brains mostly due to tissue destruction related to  
315 encephalomalacia. Hypertrophic microglial densities are directly related to cortical atrophy in  
316 Alzheimer's disease and inversely related to high density of functional neurons in tissue (48).  
317 Thus, accumulation of activated microglia may occur in damaged blood vessels or  
318 microinfarctions during cryptococcal infection. It is also possible that GXM accumulation makes  
319 activated microglia anergic or unresponsive, thus, the low phagocytic or amoeboid morphology  
320 displayed, which may facilitate the proliferation and survival of the fungus, enhancing the  
321 progression of the cerebral disease. Both minocycline- and PEA-treated tissues presented  
322 approximately three quarters of all microglial cells activated and phagocytic, but animals in both  
323 groups have low number of ramified microglia. Activated or hypertrophic microglia has been  
324 linked to oxidative stress and inflammation in neurological diseases such Alzheimer's (49),  
325 Parkinson's (50), stroke (51), and others. Moreover, minocycline-treated animals exhibited the  
326 highest number of dystrophic microglia, which have fragmented processes, probably due to cell  
327 dysfunction. Dystrophic microglia are found in high numbers in vulnerable individuals who  
328 suffer from brain degeneration (52, 53) or senescence (44) due to aging or neurological diseases.  
329 Interestingly, brains excised from AmpB and combination of AmpB and PEA groups showed  
330 similarly balanced activated, phagocytic, ramified microglia distribution percentages. It is  
331 conceivable that the highest number of ramified and rod-shaped microglia present in AmpB- and  
332 combination-treated animals, respectively, makes a difference in the fungal persistence or  
333 clearance observed in these groups, possibilities that can be tested in future studies. Elucidating

334 the impact of microglial responses or phenotypes in brain tissue infected with *Cn* is necessary  
335 given their central role in many neurodegenerative diseases, including CME, which leads to  
336 cognitive decline and mortality in patients (54).

337 Treatment of *Cn*-infected mice with combination of AmpB + PEA revealed less efficacy  
338 than the recommended standard combination of AmpB + 5-FC. All the mice treated with the  
339 standard of care combination survived through the duration (28-dpi) of the experiment. However,  
340 mortality associated with CME in humans even with optimal treatment remains high (55).  
341 Therefore, novel treatments that rapidly improve the clinical manifestation associated with CME  
342 such as intracranial pressure and high fungal burden in the cerebrospinal fluid. Here, we  
343 demonstrated that PEA is not an effective antifungal drug but may be beneficial in modulating  
344 the immune response in combination with an effective fungicidal drug. Further pre-clinical  
345 studies investigating the efficacy of immunomodulator molecules for the treatment of CME  
346 could provide medical professionals with additional cost-effective and safe antifungal therapy  
347 options of care especially in developing countries.

348

## 349 **MATERIALS AND METHODS**

350 **Ethics statement.** All animal studies were conducted according to the experimental practices  
351 and standards approved by the Institutional Animal Care and Use Committee (IACUC) at the  
352 University of Florida (Protocol #: 202011067). The IACUC at the University of Florida  
353 approved this study.

354

355 *Cn. Cn* strain H99 (serotype A) was isolated and kindly provided by John Perfect at Duke  
356 University. Yeasts were grown in Sabouraud dextrose broth (pH 5.6; BD Difco) for 24 h at 30°C  
357 in an orbital shaker (Thermo Fisher) set at 150 rpm (to early stationary phase).

358  
359 **i.c. infection with *Cn.*** C57BL/6 female mice (6-8 weeks old; Envigo) were anesthetized using  
360 isoflurane (3–5% for induction and 1–2% maintenance; model: VetFlo Vaporizer Single Channel  
361 Anesthesia System, Kent Scientific), placed in prone position over a heating pad (model:  
362 RightTemp Jr., Kent Scientific), and prepped using standard aseptic techniques. A local  
363 anesthetic, bupivacaine or ropivacaine (0.05%; Covetrus), was administered subcutaneously in  
364 the incision. The fur on the skull was carefully shaved off and the animal was securely placed in  
365 a stereotaxic apparatus (model: 940; Kopf Instruments).

366 Using a small hand-held microdrill (model: Ideal microdrill; Braintree Scientific), the  
367 skull was thinned until the underlying dura mater was visible and a 26 G Hamilton syringe was  
368 brought to the correct stereotaxic position and lowered until it touched the exposed dura. The  
369 craniotomy was around 1 mm in diameter and the correct brain coordinates were identified using  
370 a stereotaxic brain atlas (e.g., The Allen Mouse Brain Atlas; [https://mouse.brain-](https://mouse.brain-map.org/static/atlas)  
371 [map.org/static/atlas](https://mouse.brain-map.org/static/atlas)). Based on our recent study (25) and others (56, 57) using the *Cn* H99 strain,  
372 a 1-μL suspension containing 10<sup>4</sup> cryptococci in sterile saline was injected into the striatum  
373 [Stereotaxic coordinates: x (medial/lateral), -2; y (anterior/posterior), 0.2; z (dorsal/ventral), -  
374 3.5]] using a 26 G Hamilton syringe connected to a pump (model: UltraMicroPump3; World  
375 Precision Instruments). We injected the fungal inoculum in a 1-μL volume to avoid tissue  
376 damage or diffusion of the cryptococci to other regions of the brain. The skin incision on the



377 dorsal head was closed with sterile nylon suture and 2-4% topical chlorhexidine solution was be  
378 applied over the closed incision. After the surgery, mice were placed on a clean recovery cage.

379

380 **Administration of drug treatments.** One-dpi, mice were injected with a 100  $\mu$ L solution of  
381 sterile saline, minocycline (0.5 mg/kg/day (d); diluted in sterile saline; ACROS Organics),  
382 AmpB (3 mg/kg/d; diluted in sterile saline; AmpB; Gibco), PEA (0.5 mg/kg/d; diluted in sterile  
383 saline; Tokyo Chemical Industry), or AmpB (3 mg/kg/d) + PEA (0.5 mg/kg/d) combination i.p.  
384 every other day and monitored for survivability. In separate infections, mice were euthanized at  
385 determined time points via CO<sub>2</sub> inhalation and brain tissues were excised for processing for  
386 determination of CFU numbers and histopathological studies. Similarly, 5-fluorocytosine (100  
387 mg/kg/d; diluted in sterile saline; 5-FC; ThermoFisher) was used in combination with PEA (0.5  
388 mg/kg/d) or AmpB (3 mg/kg/d) and survivability was determined. The survival end points were  
389 inactivity, tachypnea, or loss of  $\geq 25\%$  of body weight from baseline weight. We monitored the  
390 mice twice daily for clinical signs, dehydration, and weight loss. Animals showing signs of  
391 dehydration or that lost more than 10% weight received supportive care such as 1 mL of  
392 parenteral fluid supplementation (saline) and moist chow on the cage floor was provided.

393

394 **CFU determinations.** Brains were excised from euthanized mice and weighed 3- and 7-dpi. The  
395 brain tissue was homogenized in 5 mL of sterile phosphate buffered saline, serially diluted, a 100  
396  $\mu$ L suspension was plated on Sabouraud dextrose agar (BD Difco) and incubated at 30°C for 48  
397 h. Quantification of viable yeast cells from infected animals were determined by CFU counting  
398 of two dilutions per animal ( $n = 6$  per day).

399

400 **Brain histology.** The brains were harvested and immersed in 4% paraformaldehyde (Fisher)  
401 overnight. Then, brains were washed 3X with sterile saline for 1 h, embedded in paraffin, 4  $\mu$ m  
402 coronal sections were serially cut using a cryostat (Tanner Scientific, model: TN50), fixed onto  
403 glass slides, and subjected to hematoxylin & eosin or Periodic acid-Schiff staining to examine  
404 tissue or fungal morphology, respectively. GXM (MAb 18B7 is an anti-cryptococcal GXM IgG1  
405 generated and generously provided by Arturo Casadevall at the Johns Hopkins Bloomberg  
406 School of Public Health; 1:1,000 dilution) and Iba-1 (rabbit anti-human Iba-1; 1:1,000 dilution;  
407 FujiFilm Wako) specific Ab (conjugated to horseradish peroxidase; dilution: 1:1,000; Santa Cruz  
408 Biotechnology) immunostaining to assess capsular release and distribution and microglial  
409 phenotype, respectively, near cryptococcomas. The slides were visualized using a Leica DMI8  
410 inverted microscope, and images were captured with a Leica DFC7000 digital camera using LAS  
411 X digital imaging software. GXM distribution in tissue sections at 10X magnification ( $n = 15$   
412 fields per brain) was calculated using NIH Image J color deconvolution tool software (version  
413 1.53q). The mean color intensity of the GXM for each treatment group was plotted in Prism  
414 version 9.5 (GraphPad). The images were examined and analyzed by Dr. Mohamed F. Hamed, a  
415 veterinary pathologist.

416  
417 **Capsule measurements with India ink.** The capsules of cryptococci present in the brain tissue  
418 of infected mice were measured from 10- $\mu$ L of homogenates prepared in phosphate-buffered  
419 saline. India ink stain (BD Scientific) was diluted 1:5 in sterile milli-Q water and used to  
420 visualize the capsules under light microscopy. Images were taken with a Leica DMI8 inverted  
421 microscope and DFC7000 T digital camera. The diameters of both capsule and cell body were  
422 measured using the Leica software platform LAS X. Capsule volume was calculated for  $\geq 200$

423 cells per group ( $n = 3$  animal per group) using the volume formula, where  $R$  = radius of capsule  
424 and  $r$  = radius of cell body: capsule volume ( $V$ ) =  $4/3 \pi(R^2-r^2)$ .

425  
426 **Statistical analysis.** All data were subjected to statistical analysis using Prism 9.5 (GraphPad).  
427 Differences in survival rates were analyzed by the log-rank test (Mantel-Cox).  $P$  values for  
428 multiple comparisons were calculated by one-way analysis of variance (ANOVA) and were  
429 adjusted by use of the Tukey's *post-hoc* analysis.  $P$  values of  $<0.05$  were considered significant.

430  
431 **FIGURE LEGENDS**

432 **Fig. 1. Palmitoylethanolamide (PEA) treatment prolongs survival of C57BL/6 mice infected**  
433 **with *C. neoformans* (*Cn*) when combined with Amphotericin B (AmpB). (A)** Experimental  
434 timeline for the intracerebral (i.c.) *Cn* infection and every other day intraperitoneal (i.p.)  
435 treatment model used in this study. Mice ( $n=7$  animals per group) were infected with  $10^4$  *Cn*  
436 strain H99 and administered treatments (e.g., saline (untreated), minocycline, AmpB, PEA, and  
437 AmpB + PEA) by i.p. injection every other day. Then, survival studies and colony forming units  
438 (CFU) determinations, histopathology, and microscopy were performed 3- and 7-days post-  
439 infection (dpi). The diagram was created with BioRender.com by Melissa E. Munzen. **(B)**  
440 Survival differences of C57BL/6 mice i.c. infected. Significance ( $P < 0.05$ ) was calculated by  
441 log-rank (Mantel-Cox) analysis. \*, #, and X indicate statistically different than untreated,  
442 minocycline-, and PEA-treatment groups, respectively. **(C)** Body weight was monitored for  
443 changes and development of clinical symptoms indicative of mice nearing endpoint. Each time  
444 point corresponds to mean weight and error bars denote standard deviations (SDs).

445

446 **Fig. 2. PEA and AmpB combination reduces cryptococcal burden in brains of mice 7 days**  
447 **post-infection (dpi). (A)** Periodic acid-Schiff-stained 4  $\mu\text{m}$  brain sections indicating infection by  
448 *Cn* in C57BL/6 mice ( $n = 3$  mice per group). Mouse brains were excised 7-dpi. Representative  
449 10X (left panel), 20X (left center panel), 40X (right center panel), and 100X (right panel)  
450 magnifications (red-stained *Cn* cell wall; scale bar: 50  $\mu\text{m}$ ) are shown. Panel images are a  
451 magnification of the black rectangle in the corresponding left-stained section to display tissue  
452 morphology surrounding cryptococcoma in each treatment group. Arrows indicate cryptococci.  
453 **(B)** Fungal burden (CFU) in brains collected from *Cn* H99-infected mice ( $n = 6$  mice per group)  
454 at 3- and 7-dpi. Quantification of viable yeast cells from infected animals were determined by  
455 CFU counting from two dilutions per mouse ( $n = 6$  plates per animal) in phosphate-buffered  
456 saline (PBS). CFU determinations are based on detectable colonies at the defined concentrations  
457 in PBS (for 3-dpi, 1:1,000 and 1:10,000; for 7-dpi, 1: 10,000 and 1:50,000). Each symbol  
458 represents a single CFU determination ( $n = 36$  plates per group). Bars and error bars denote  
459 means and SDs, respectively. Significance (\*\*\*\*,  $P < 0.0001$ ; \*\*\*,  $P < 0.001$ ) was calculated by  
460 one-way analysis of variance (ANOVA) and adjusted using Tukey's *post hoc* analysis. ns  
461 denotes comparisons which are not statistically significant.

462  
463 **Fig. 3. Robust glial cell responses were observed around the brain region of infection of**  
464 **mice treated with AmpB and PEA combination.** Hematoxylin & eosin (7-dpi)-stained brain  
465 sections (4  $\mu\text{m}$  thickness) from i.c. infected mice with *Cn* H99 ( $n = 3$  per group) and treated with  
466 saline (untreated), minocycline, AmpB, PEA, or AmpB + PEA. Representative 10X (left panel),  
467 20X (left center panel), 40X (right center panel), and 100X (right panel) magnifications images

468 are shown. Arrows indicate histological changes described in the result section text. Scale bars:  
469 50  $\mu\text{m}$ .

470

471 **Fig. 4. C57BL/6 mice treated with AmpB or AmpB + PEA showed significant reduction in**  
472 ***Cn* glucuronoxylomannan (GXM) secretion. (A)** Representative images of brain tissue  
473 sections (7-dpi) from *Cn* H99-infected mice treated with saline (untreated), minocycline, AmpB,  
474 PEA, or AmpB + PEA co-stained with GXM-specific monoclonal antibody (mAb 18B7; red-  
475 pink) and ionized calcium binding adaptor molecule-1 (Iba-1; brown) marker for microglia.  
476 Representative 10X (left panel), 20X (left center panel), 40X (right center panel), and 100X  
477 (right panel) magnifications are shown. Panel images are a magnification of the black rectangle  
478 in the corresponding left-stained section to display tissue morphology surrounding  
479 cryptococcoma in each treatment group. Arrow indicates plugs adhered to the ependymal cells.  
480 Scale bars: 50  $\mu\text{m}$ . **(B)** Quantification of GXM intensity. Regions of GXM release were  
481 measured ( $n = 15$  fields per group). Boxes and whiskers denote means and SDs, respectively.  
482 Significance (\*\*,  $P < 0.01$ ; \*,  $P < 0.05$ ) was calculated by one-way ANOVA and adjusted using  
483 Tukey's *post hoc* analysis. ns denotes comparisons which are not statistically significant.

484

485 **Fig. 5. Brains from C57BL/6 mice treated with AmpB or AmpB + PEA exhibit cryptococci**  
486 **with considerable capsule size decrease. (A)** Images of brain homogenates (7-dpi) from mice  
487 i.c. infected with  $10^4$  *Cn* cells and treated with saline (untreated), minocycline, AmpB, PEA, or  
488 AmpB + PEA. Fungal cells were stained with India Ink. Each image was examined by light  
489 microscopy using a Leica DMI8 inverted microscope and images captured with a Leica  
490 DFC7000 digital camera using LAS X digital imaging software. **(B)** Capsule volume ( $V = 4/3$

491  $\pi(R^2-r^2)$  for *Cn* cells in brain homogenates from each group was calculated using Leica LAS X  
492 software. Brain homogenates from 3 mice per group were analyzed, and  $\geq 200$  cells were  
493 measured. Bars and error bars denote means and SDs, respectively. Significance (\*,  $P < 0.05$ )  
494 was calculated by one-way ANOVA and adjusted using Tukey's *post hoc* analysis. ns denotes  
495 comparisons which are not statistically significant.

496

497 **Fig. 6. Differential microglial morphology in brain tissue infected with *Cn* after treatment**

498 **with AmpB, PEA, or combination. (A)** Representative images of brain tissue sections (7-dpi)

499 from *Cn* H99-infected mice ( $n = 3$  mice per group) treated with saline (untreated), minocycline,

500 AmpB, PEA, or AmpB + PEA co-stained with mAb 18B7 (GXM, red-pink) and Iba-1

501 (microglia, brown). Representative 10X (left panel), 20X (left center panel), 40X (right center

502 panel), and 100X (right panel) magnifications are shown. Panel images are a magnification of the

503 black rectangle in the corresponding left-stained section to display microglia morphological

504 changes near a cryptococcoma in each treatment group. Scale bars: 50  $\mu\text{m}$ . **(B)** Pie charts

505 showing the percentage of microglial morphology distribution (e.g., activated, ramified,

506 dystrophic, phagocytic/amoeboid, and rod-shaped cells) in brain tissue during infection with *Cn*

507 H99 and different treatments. Microglial phenotype abundance was visualized using light

508 microscopy and classified according to their morphology.

509

510 **Fig. 7. Combination of AmpB and PEA prolongs survival of C57BL/6 mice, although not**

511 **with efficacy comparable to AmpB and 5-Fluorocytosine (5-FC).** (A) Survival differences of

512 C57BL/6 mice i.c. infected with  $10^4$  *Cn* strain H99 ( $n = 6$  per group) and every other day given

513 i.p. treatment with saline (untreated), AmpB + PEA, PEA + 5-FC, or AmpB + 5-FC.

514 Significance ( $P < 0.05$ ) was calculated by log-rank (Mantel-Cox) analysis. \*, #, and X indicate  
515 statistically different than untreated, AmpB + PEA-, and PEA + 5-FC-treatment groups,  
516 respectively. **(B)** Body weight was monitored for changes and development of clinical symptoms  
517 indicative of mice nearing endpoint. Each time point corresponds to mean weight and error bars  
518 denote SDs.

519

## 520 **ACKNOWLEDGEMENTS**

521 M.E.M., M.R-G, M.F.H., C.L.C-N, M.R.D., and L.R.M. were supported by the National Institute  
522 of Allergy and Infectious Diseases (NIAID award # R01AI145559) of the US National Institutes  
523 of Health (NIH). V.E. was supported by the UFCD's Comprehensive Training Program in Oral  
524 Biology (NIH NIDCR Award # T90DE021990/R90DE022530). K.A. was funded by The Florida  
525 Department of Health Ed and Ethel Moore Alzheimer's Disease Research Program (Award #  
526 21A12). The funders had no role in the study design, data collection and analysis, decision to  
527 publish, or preparation of the manuscript.

528

## 529 **AUTHORSHIP CONTRIBUTIONS**

530 All authors contributed to the project design and experimental procedures, analyzed data,  
531 provided the figure presentation, and manuscript writing.

532

## 533 **REFERENCES**

- 534 1. Kabir Z, Cunningham C. 2022. The global burden of cryptococcosis-a neglected tropical  
535 disease? *Lancet Infect Dis* 22:1658-1660.
- 536 2. Rajasingham R, Smith RM, Park BJ, Jarvis JN, Govender NP, Chiller TM, Denning DW,  
537 Loyse A, Boulware DR. 2017. Global burden of disease of HIV-associated cryptococcal  
538 meningitis: an updated analysis. *Lancet Infect Dis* 17:873-881.

- 539 3. Rajasingham R, Govender NP, Jordan A, Loyse A, Shroufi A, Denning DW, Meya DB,  
540 Chiller TM, Boulware DR. 2022. The global burden of HIV-associated cryptococcal  
541 infection in adults in 2020: a modelling analysis. *Lancet Infect Dis* 22:1748-1755.
- 542 4. Williamson PR, Jarvis JN, Panackal AA, Fisher MC, Molloy SF, Loyse A, Harrison TS.  
543 2017. Cryptococcal meningitis: epidemiology, immunology, diagnosis and therapy. *Nat*  
544 *Rev Neurol* 13:13-24.
- 545 5. Kneale M, Bartholomew JS, Davies E, Denning DW. 2016. Global access to antifungal  
546 therapy and its variable cost. *J Antimicrob Chemother* 71:3599-3606.
- 547 6. Perfect JR, Dismukes WE, Dromer F, Goldman DL, Graybill JR, Hamill RJ, Harrison  
548 TS, Larsen RA, Lortholary O, Nguyen MH, Pappas PG, Powderly WG, Singh N, Sobel  
549 JD, Sorrell TC. 2010. Clinical practice guidelines for the management of cryptococcal  
550 disease: 2010 update by the infectious diseases society of america. *Clin Infect Dis*  
551 50:291-322.
- 552 7. Warrell CE, Macrae C, McLean ARD, Wilkins E, Ashley EA, Smithuis F, Tun NN.  
553 2021. Ambulatory induction phase treatment of cryptococcal meningitis in HIV  
554 integrated primary care clinics, Yangon, Myanmar. *BMC Infect Dis* 21:375.
- 555 8. Meiring S, Fortuin-de Smidt M, Kularatne R, Dawood H, Govender NP, Germs SA.  
556 2016. Prevalence and Hospital Management of Amphotericin B Deoxycholate-Related  
557 Toxicities during Treatment of HIV-Associated Cryptococcal Meningitis in South Africa.  
558 *PLoS Negl Trop Dis* 10:e0004865.
- 559 9. Rajasingham R, Rolfes MA, Birkenkamp KE, Meya DB, Boulware DR. 2012.  
560 Cryptococcal meningitis treatment strategies in resource-limited settings: a cost-  
561 effectiveness analysis. *PLoS Med* 9:e1001316.
- 562 10. Jarvis JN, Lawrence DS, Meya DB, Kagimu E, Kasibante J, Mpoza E, Rutakingirwa MK,  
563 Ssebambulidde K, Tugume L, Rhein J, Boulware DR, Mwandumba HC, Moyo M,  
564 Mzinganjira H, Kanyama C, Hosseinipour MC, Chawinga C, Meintjes G, Schutz C,  
565 Comins K, Singh A, Muzoora C, Jjunju S, Nuwagira E, Mosepele M, Leeme T,  
566 Siamisang K, Ndhlovu CE, Hlupeni A, Mutata C, van Widenfelt E, Chen T, Wang D,  
567 Hope W, Boyer-Chammard T, Loyse A, Molloy SF, Youssouf N, Lortholary O, Lalloo  
568 DG, Jaffar S, Harrison TS, Ambition Study G. 2022. Single-Dose Liposomal  
569 Amphotericin B Treatment for Cryptococcal Meningitis. *N Engl J Med* 386:1109-1120.



- 570 11. Valero G, Graybill JR. 1995. Successful treatment of cryptococcal meningitis with  
571 amphotericin B colloidal dispersion: report of four cases. *Antimicrob Agents Chemother*  
572 39:2588-90.
- 573 12. Ngan NTT, Thanh Hoang Le N, Vi Vi NN, Van NTT, Mai NTH, Van Anh D, Trieu PH,  
574 Lan NPH, Phu NH, Chau NVV, Lalloo DG, Hope W, Beardsley J, White NJ, Geskus R,  
575 Thwaites GE, Krysan D, Tai LTH, Kestelyn E, Binh TQ, Hung LQ, Tung NLN, Day JN.  
576 2021. An open label randomized controlled trial of tamoxifen combined with  
577 amphotericin B and fluconazole for cryptococcal meningitis. *Elife* 10.
- 578 13. Valenza M, Facchinetti R, Steardo L, Scuderi C. 2022. Palmitoylethanolamide and White  
579 Matter Lesions: Evidence for Therapeutic Implications. *Biomolecules* 12.
- 580 14. Zhou G, Fu X, Wang L, Cao Y, Zhuang J, Hu J, Li Y, Xu C, Gao S, Shao A, Wang L.  
581 2022. Palmitoylethanolamide ameliorates neuroinflammation via modulating PPAR-  
582 alpha to promote the functional outcome after intracerebral hemorrhage. *Neurosci Lett*  
583 781:136648.
- 584 15. D'Agostino G, La Rana G, Russo R, Sasso O, Iacono A, Esposito E, Mattace Raso G,  
585 Cuzzocrea S, Loverme J, Piomelli D, Meli R, Calignano A. 2009. Central administration  
586 of palmitoylethanolamide reduces hyperalgesia in mice via inhibition of NF-kappaB  
587 nuclear signalling in dorsal root ganglia. *Eur J Pharmacol* 613:54-9.
- 588 16. Lama A, Pirozzi C, Severi I, Morgese MG, Senzacqua M, Annunziata C, Comella F, Del  
589 Piano F, Schiavone S, Petrosino S, Mollica MP, Diano S, Trabace L, Calignano A,  
590 Giordano A, Mattace Raso G, Meli R. 2022. Palmitoylethanolamide dampens  
591 neuroinflammation and anxiety-like behavior in obese mice. *Brain Behav Immun*  
592 102:110-123.
- 593 17. Orefice NS, Alhouayek M, Carotenuto A, Montella S, Barbato F, Comelli A, Calignano  
594 A, Muccioli GG, Orefice G. 2016. Oral Palmitoylethanolamide Treatment Is Associated  
595 with Reduced Cutaneous Adverse Effects of Interferon-beta1a and Circulating  
596 Proinflammatory Cytokines in Relapsing-Remitting Multiple Sclerosis.  
597 *Neurotherapeutics* 13:428-38.
- 598 18. Esposito E, Impellizzeri D, Mazzon E, Paterniti I, Cuzzocrea S. 2012. Neuroprotective  
599 activities of palmitoylethanolamide in an animal model of Parkinson's disease. *PLoS One*  
600 7:e41880.

- 601 19. Facchinetti R, Valenza M, Bronzuoli MR, Menegoni G, Ratano P, Steardo L,  
602 Campolongo P, Scuderi C. 2020. Looking for a Treatment for the Early Stage of  
603 Alzheimer's Disease: Preclinical Evidence with Co-Ultramicronized  
604 Palmitoylethanolamide and Luteolin. *Int J Mol Sci* 21.
- 605 20. Scuderi C, Valenza M, Stecca C, Esposito G, Carratu MR, Steardo L. 2012.  
606 Palmitoylethanolamide exerts neuroprotective effects in mixed neuroglial cultures and  
607 organotypic hippocampal slices via peroxisome proliferator-activated receptor-alpha. *J*  
608 *Neuroinflammation* 9:49.
- 609 21. Redlich S, Ribes S, Schutze S, Nau R. 2014. Palmitoylethanolamide stimulates  
610 phagocytosis of Escherichia coli K1 by macrophages and increases the resistance of mice  
611 against infections. *J Neuroinflammation* 11:108.
- 612 22. Beggiato S, Tomasini MC, Ferraro L. 2019. Palmitoylethanolamide (PEA) as a Potential  
613 Therapeutic Agent in Alzheimer's Disease. *Front Pharmacol* 10:821.
- 614 23. Kahlich R, Klima J, Cihla F, Frankova V, Masek K, Rosicky M, Matousek F, Bruthans J.  
615 1979. Studies on prophylactic efficacy of N-2-hydroxyethyl palmitamide (Impulsin) in  
616 acute respiratory infections. Serologically controlled field trials. *J Hyg Epidemiol*  
617 *Microbiol Immunol* 23:11-24.
- 618 24. Keppel Hesselink JM, de Boer T, Witkamp RF. 2013. Palmitoylethanolamide: A Natural  
619 Body-Owned Anti-Inflammatory Agent, Effective and Safe against Influenza and Common  
620 Cold. *Int J Inflam* 2013:151028.
- 621 25. Hamed MF, Enriquez V, Munzen ME, Charles-Nino CL, Mihu MR, Khoshbouei H,  
622 Alvina K, Martinez LR. 2023. Clinical and pathological characterization of Central  
623 Nervous System cryptococcosis in an experimental mouse model of stereotaxic  
624 intracerebral infection. *PLoS Negl Trop Dis* 17:e0011068.
- 625 26. Lee SC, Dickson DW, Casadevall A. 1996. Pathology of cryptococcal  
626 meningoencephalitis: analysis of 27 patients with pathogenetic implications. *Hum Pathol*  
627 27:839-47.
- 628 27. Tien RD, Chu PK, Hesselink JR, Duberg A, Wiley C. 1991. Intracranial cryptococcosis  
629 in immunocompromised patients: CT and MR findings in 29 cases. *AJNR Am J*  
630 *Neuroradiol* 12:283-9.

- 631 28. Hamed MF, Araujo GRS, Munzen ME, Reguera-Gomez M, Epstein C, Lee HH, Frases S,  
632 Martinez LR. 2023. Phospholipase B Is Critical for *Cryptococcus neoformans* Survival in  
633 the Central Nervous System. *mBio* doi:10.1128/mbio.02640-22:e0264022.
- 634 29. Fernandes KE, Brockway A, Haverkamp M, Cuomo CA, van Ogtrop F, Perfect JR,  
635 Carter DA. 2018. Phenotypic Variability Correlates with Clinical Outcome in  
636 *Cryptococcus* Isolates Obtained from Botswanan HIV/AIDS Patients. *mBio* 9.
- 637 30. Zaragoza O, Chrisman CJ, Castelli MV, Frases S, Cuenca-Estrella M, Rodriguez-Tudela  
638 JL, Casadevall A. 2008. Capsule enlargement in *Cryptococcus neoformans* confers  
639 resistance to oxidative stress suggesting a mechanism for intracellular survival. *Cell*  
640 *Microbiol* 10:2043-57.
- 641 31. Ribes S, Ebert S, Czesnik D, Regen T, Zeug A, Bukowski S, Mildner A, Eiffert H,  
642 Hanisch UK, Hammerschmidt S, Nau R. 2009. Toll-like receptor prestimulation increases  
643 phagocytosis of *Escherichia coli* DH5alpha and *Escherichia coli* K1 strains by murine  
644 microglial cells. *Infect Immun* 77:557-64.
- 645 32. Zhou Q, Gault RA, Kozel TR, Murphy WJ. 2007. Protection from direct cerebral  
646 *cryptococcus* infection by interferon-gamma-dependent activation of microglial cells. *J*  
647 *Immunol* 178:5753-61.
- 648 33. Nau R, Ribes S, Djukic M, Eiffert H. 2014. Strategies to increase the activity of microglia  
649 as efficient protectors of the brain against infections. *Front Cell Neurosci* 8:138.
- 650 34. Coburn AF, Trulson MF, Moore LV. 1954. [Further study of the effect of the  
651 administration of egg yolk on susceptibility of children to rheumatic infection]. *Minerva*  
652 *Med* 45:1534-6.
- 653 35. Mesa-Arango AC, Trevijano-Contador N, Roman E, Sanchez-Fresneda R, Casas C,  
654 Herrero E, Arguelles JC, Pla J, Cuenca-Estrella M, Zaragoza O. 2014. The production of  
655 reactive oxygen species is a universal action mechanism of Amphotericin B against  
656 pathogenic yeasts and contributes to the fungicidal effect of this drug. *Antimicrob Agents*  
657 *Chemother* 58:6627-38.
- 658 36. Chen SF, Lu CH, Lui CC, Huang CR, Chuang YC, Tan TY, Tsai NW, Chang CC, Tsai  
659 WC, Chang WN. 2011. Acute/subacute cerebral infarction (ASCI) in HIV-negative  
660 adults with cryptococcal meningoencephalitis (CM): a MRI-based follow-up study and a  
661 clinical comparison to HIV-negative CM adults without ASCI. *BMC Neurol* 11:12.

- 662 37. Shimoda Y, Ohtomo S, Arai H, Ohtoh T, Tominaga T. 2017. Subarachnoid small vein  
663 occlusion due to inflammatory fibrosis-a possible mechanism for cerebellar infarction in  
664 cryptococcal meningoencephalitis: a case report. *BMC Neurol* 17:157.
- 665 38. Lee HH, Del Pozzo J, Salamanca SA, Hernandez H, Martinez LR. 2019. Reduced  
666 phagocytosis and killing of *Cryptococcus neoformans* biofilm-derived cells by J774.16  
667 macrophages is associated with fungal capsular production and surface modification.  
668 *Fungal Genet Biol* 132:103258.
- 669 39. Yauch LE, Lam JS, Levitz SM. 2006. Direct inhibition of T-cell responses by the  
670 *Cryptococcus* capsular polysaccharide glucuronoxylomannan. *PLoS Pathog* 2:e120.
- 671 40. Zaragoza O, Mihu C, Casadevall A, Nosanchuk JD. 2005. Effect of amphotericin B on  
672 capsule and cell size in *Cryptococcus neoformans* during murine infection. *Antimicrob*  
673 *Agents Chemother* 49:4358-61.
- 674 41. Stein JM, Burdon PJ. 1960. *Cryptococcus neoformans* infection of the central nervous  
675 system: a case treated by amphotericin B, with postmortem examination. *Ann Intern Med*  
676 52:445-53.
- 677 42. Wolf SA, Boddeke HW, Kettenmann H. 2017. Microglia in Physiology and Disease.  
678 *Annu Rev Physiol* 79:619-643.
- 679 43. Lee SC, Kress Y, Zhao ML, Dickson DW, Casadevall A. 1995. *Cryptococcus*  
680 *neoformans* survive and replicate in human microglia. *Lab Invest* 73:871-9.
- 681 44. Martini AC, Helman AM, McCarty KL, Lott IT, Doran E, Schmitt FA, Head E. 2020.  
682 Distribution of microglial phenotypes as a function of age and Alzheimer's disease  
683 neuropathology in the brains of people with Down syndrome. *Alzheimers Dement (Amst)*  
684 12:e12113.
- 685 45. Ziebell JM, Taylor SE, Cao T, Harrison JL, Lifshitz J. 2012. Rod microglia: elongation,  
686 alignment, and coupling to form trains across the somatosensory cortex after  
687 experimental diffuse brain injury. *J Neuroinflammation* 9:247.
- 688 46. Bachstetter AD, Van Eldik LJ, Schmitt FA, Neltner JH, Ighodaro ET, Webster SJ, Patel  
689 E, Abner EL, Kryscio RJ, Nelson PT. 2015. Disease-related microglia heterogeneity in  
690 the hippocampus of Alzheimer's disease, dementia with Lewy bodies, and hippocampal  
691 sclerosis of aging. *Acta Neuropathol Commun* 3:32.

- 692 47. Streit WJ, Xue QS, Tischer J, Bechmann I. 2014. Microglial pathology. *Acta*  
693 *Neuropathol Commun* 2:142.
- 694 48. Ohm DT, Fought AJ, Martersteck A, Coventry C, Sridhar J, Gefen T, Weintraub S, Bigio  
695 E, Mesulam MM, Rogalski E, Geula C. 2021. Accumulation of neurofibrillary tangles  
696 and activated microglia is associated with lower neuron densities in the aphasic variant of  
697 Alzheimer's disease. *Brain Pathol* 31:189-204.
- 698 49. Wang C, Zong S, Cui X, Wang X, Wu S, Wang L, Liu Y, Lu Z. 2023. The effects of  
699 microglia-associated neuroinflammation on Alzheimer's disease. *Front Immunol*  
700 14:1117172.
- 701 50. Standaert DG, Harms AS, Childers GM, Webster JM. 2023. Disease mechanisms as  
702 subtypes: Inflammation in Parkinson disease and related disorders. *Handb Clin Neurol*  
703 193:95-106.
- 704 51. Peng L, Hu G, Yao Q, Wu J, He Z, Law BY, Hu G, Zhou X, Du J, Wu A, Yu L. 2022.  
705 Microglia autophagy in ischemic stroke: A double-edged sword. *Front Immunol*  
706 13:1013311.
- 707 52. Auge E, Bechmann I, Llor N, Vilaplana J, Krueger M, Pelegri C. 2019. Corpora  
708 amyloacea in human hippocampal brain tissue are intracellular bodies that exhibit a  
709 homogeneous distribution of neo-epitopes. *Sci Rep* 9:2063.
- 710 53. Streit WJ, Braak H, Xue QS, Bechmann I. 2009. Dystrophic (senescent) rather than  
711 activated microglial cells are associated with tau pathology and likely precede  
712 neurodegeneration in Alzheimer's disease. *Acta Neuropathol* 118:475-85.
- 713 54. Kashef Hamadani BH, Franco-Paredes C, McCollister B, Shapiro L, Beckham JD,  
714 Henao-Martinez AF. 2018. Cryptococcosis and cryptococcal meningitis: New predictors  
715 and clinical outcomes at a United States academic medical centre. *Mycoses* 61:314-320.
- 716 55. Person AK, Ramirez BC, Kim A, Veloso V, Maruri F, Wandeler G, Fox M, Moore R,  
717 Gill MJ, Imran D, Van Nguyen K, Nalitya E, Muyindike W, Shepherd BE, McGowan  
718 CC. 2023. Cryptococcal Meningitis and Clinical Outcomes in Persons with HIV: A  
719 Global View. *Clin Infect Dis* doi:10.1093/cid/ciad076.
- 720 56. Wiederhold NP, Kovanda L, Najvar LK, Bocanegra R, Olivo M, Kirkpatrick WR,  
721 Patterson TF. 2016. Isavuconazole Is Effective for the Treatment of Experimental  
722 Cryptococcal Meningitis. *Antimicrob Agents Chemother* 60:5600-3.

723 57. Wiederhold NP, Najvar LK, Bocanegra R, Kirkpatrick WR, Sorrell TC, Patterson TF.  
724 2013. Limited activity of miltefosine in murine models of cryptococcal  
725 meningoencephalitis and disseminated cryptococcosis. *Antimicrob Agents Chemother*  
726 57:745-50.  
727

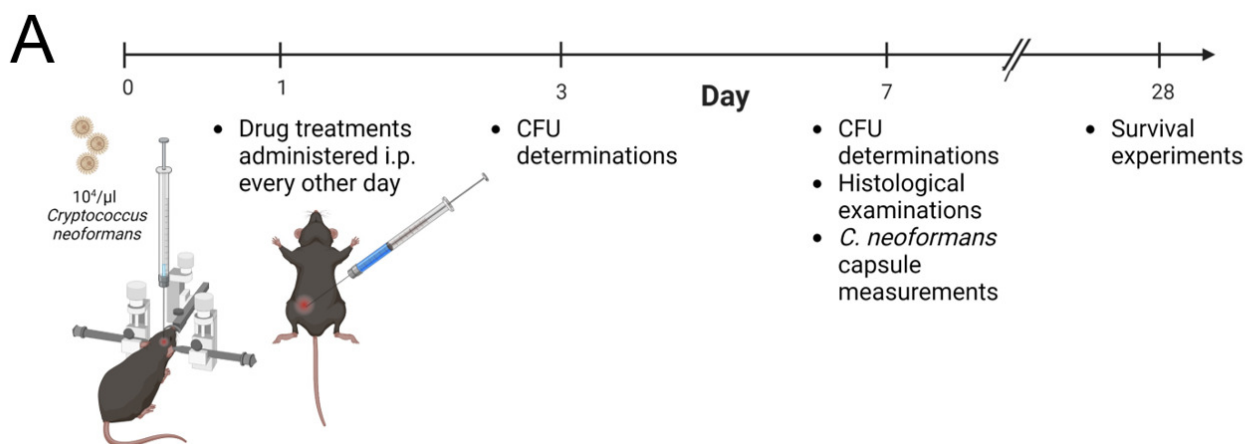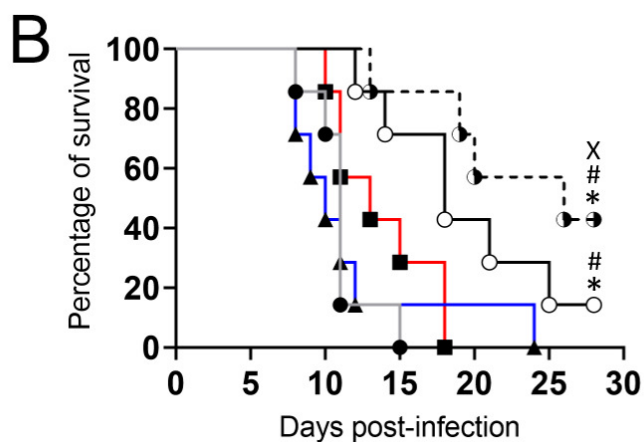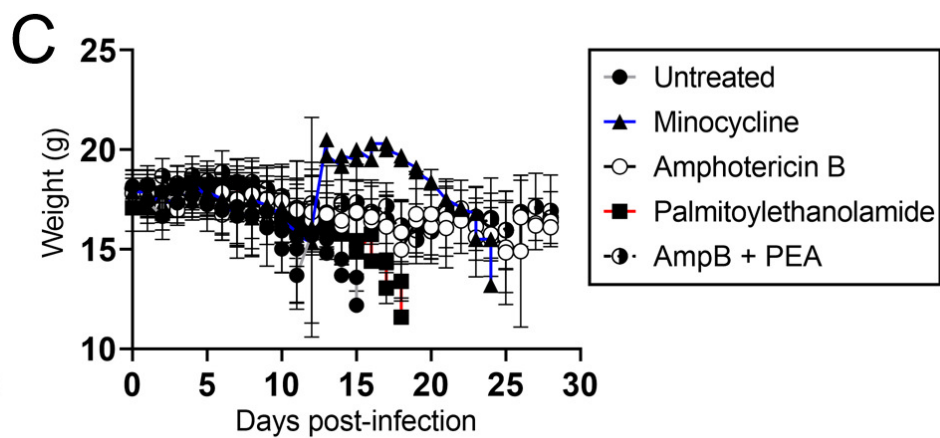

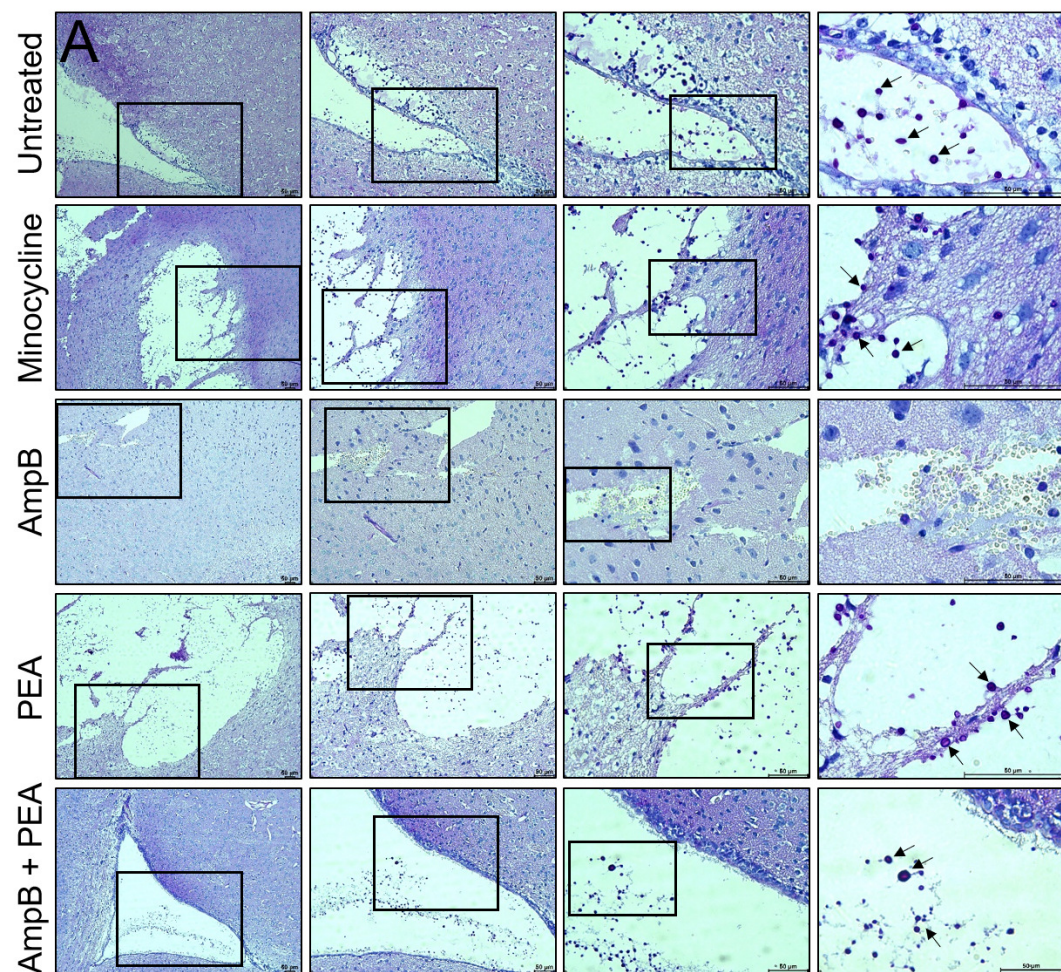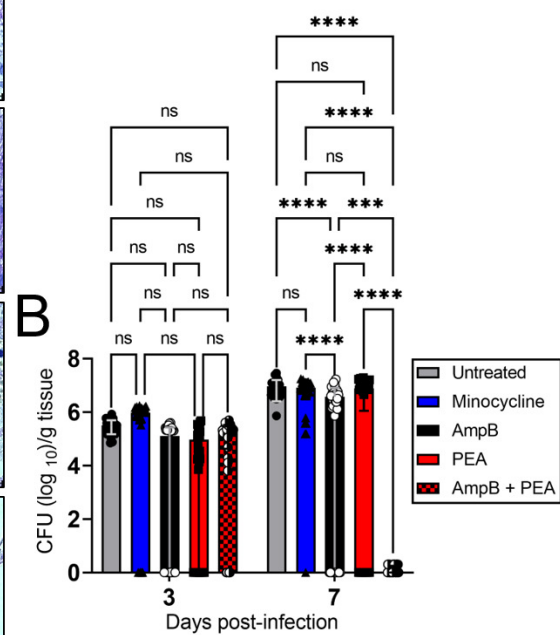



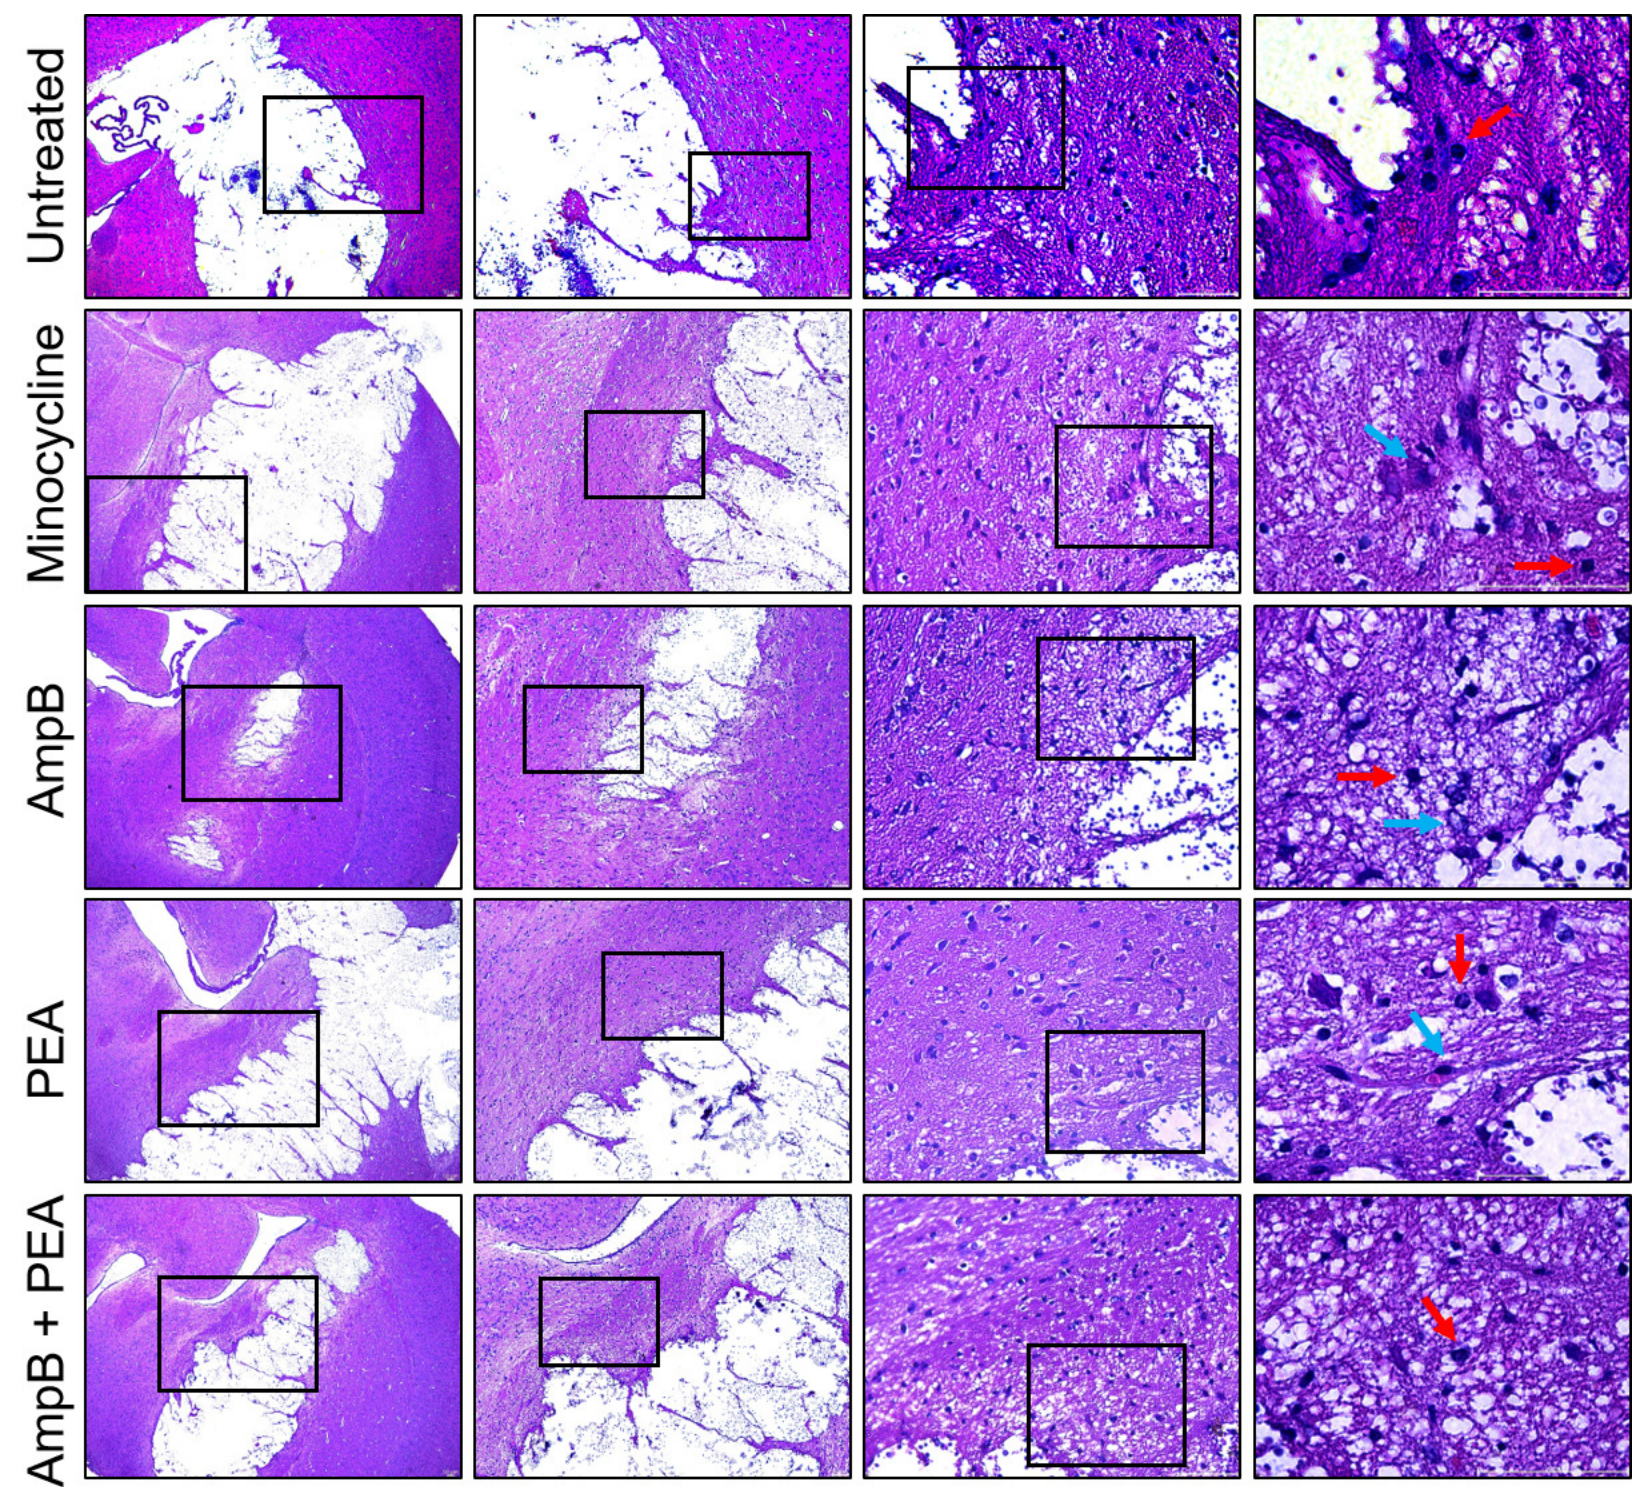

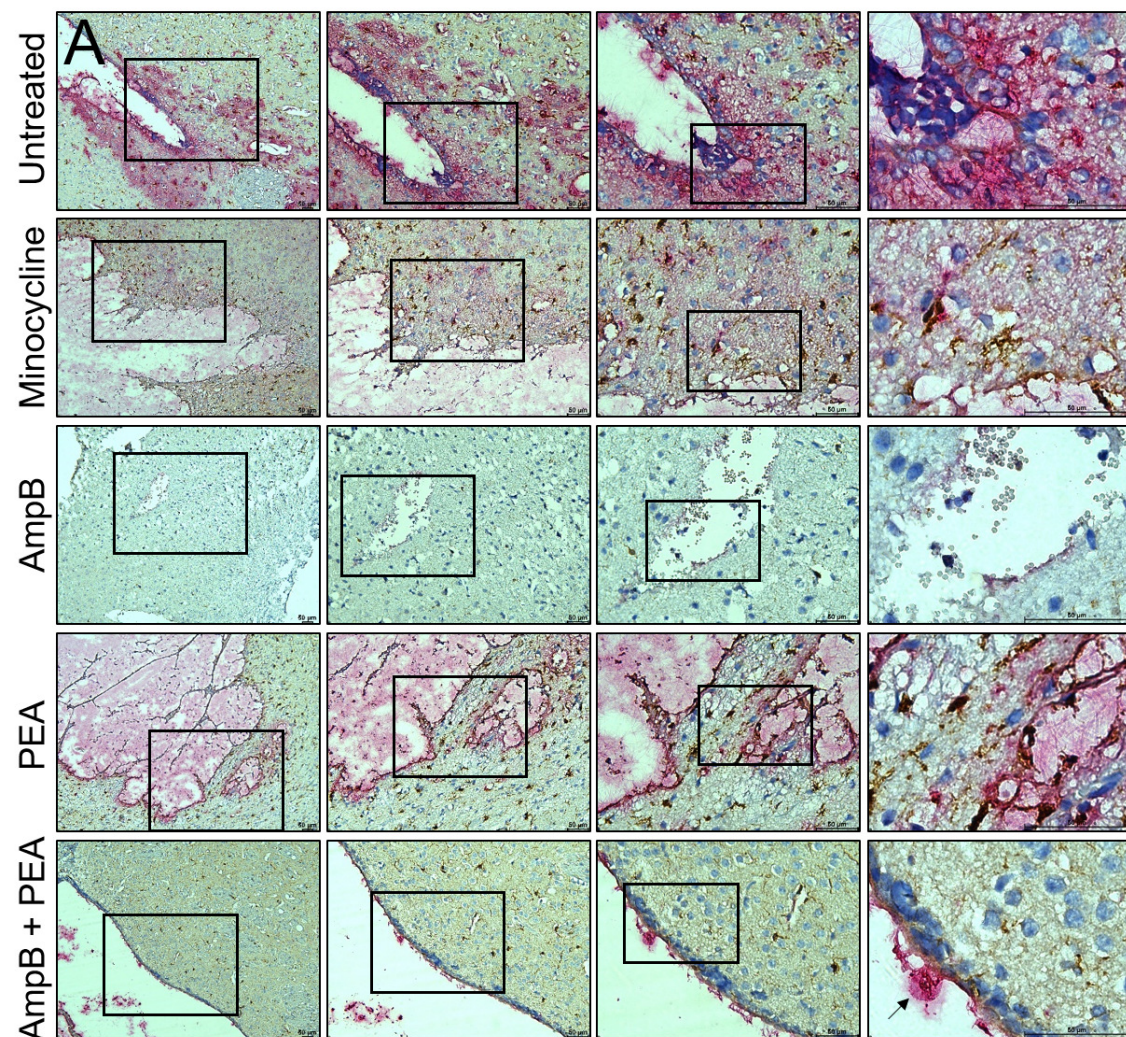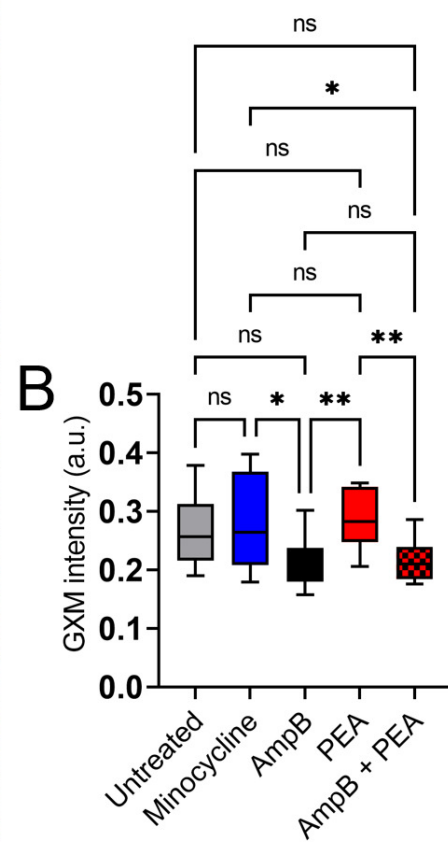

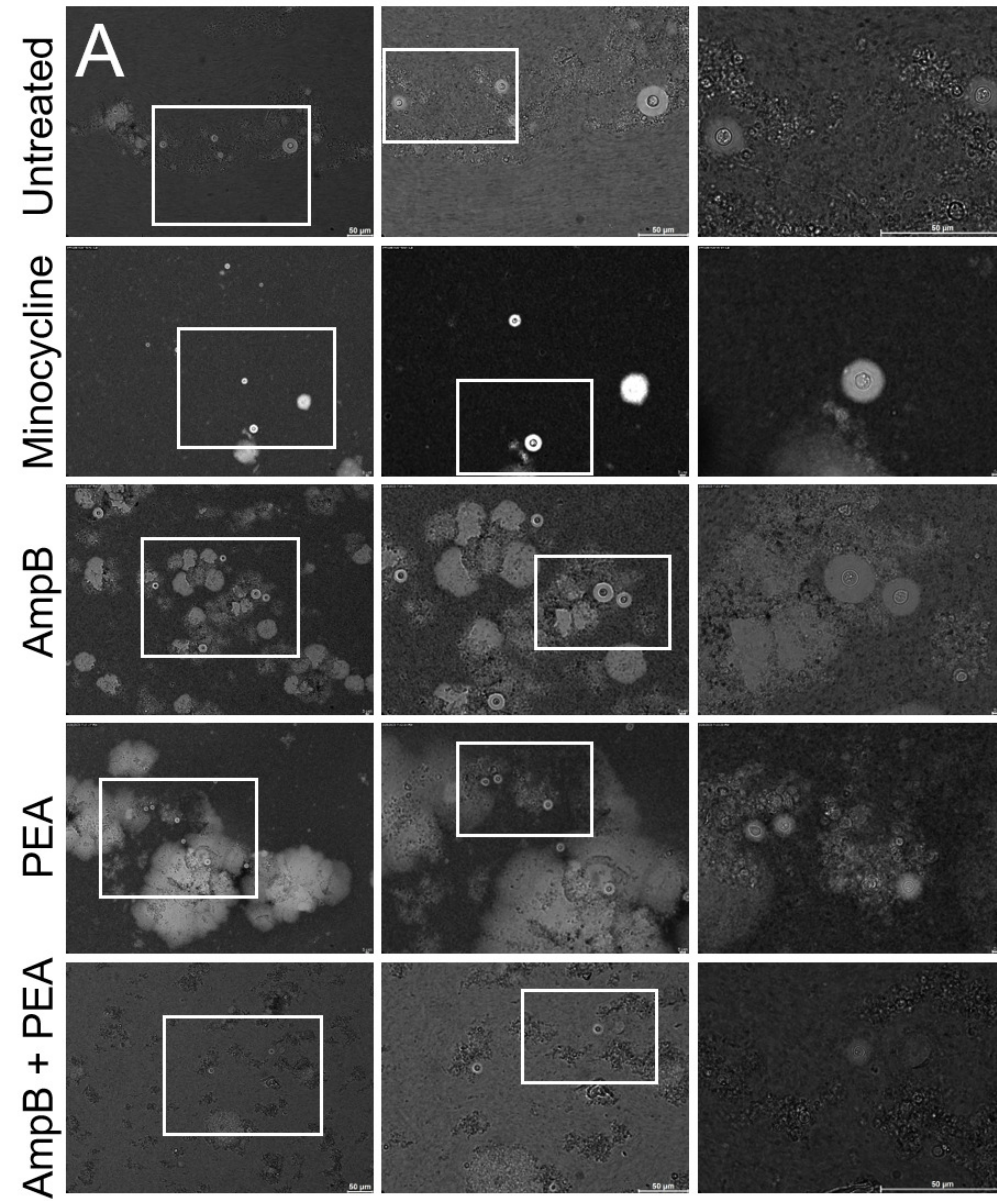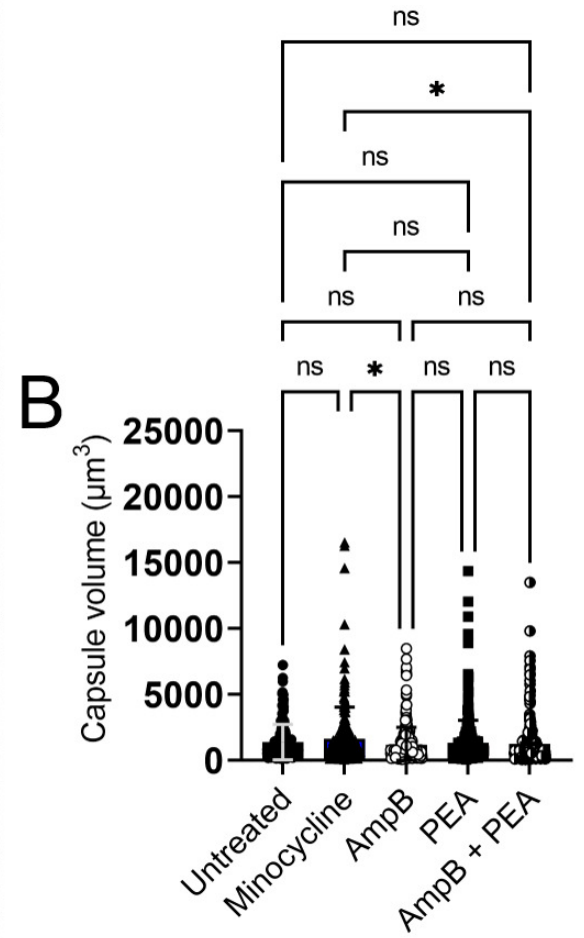

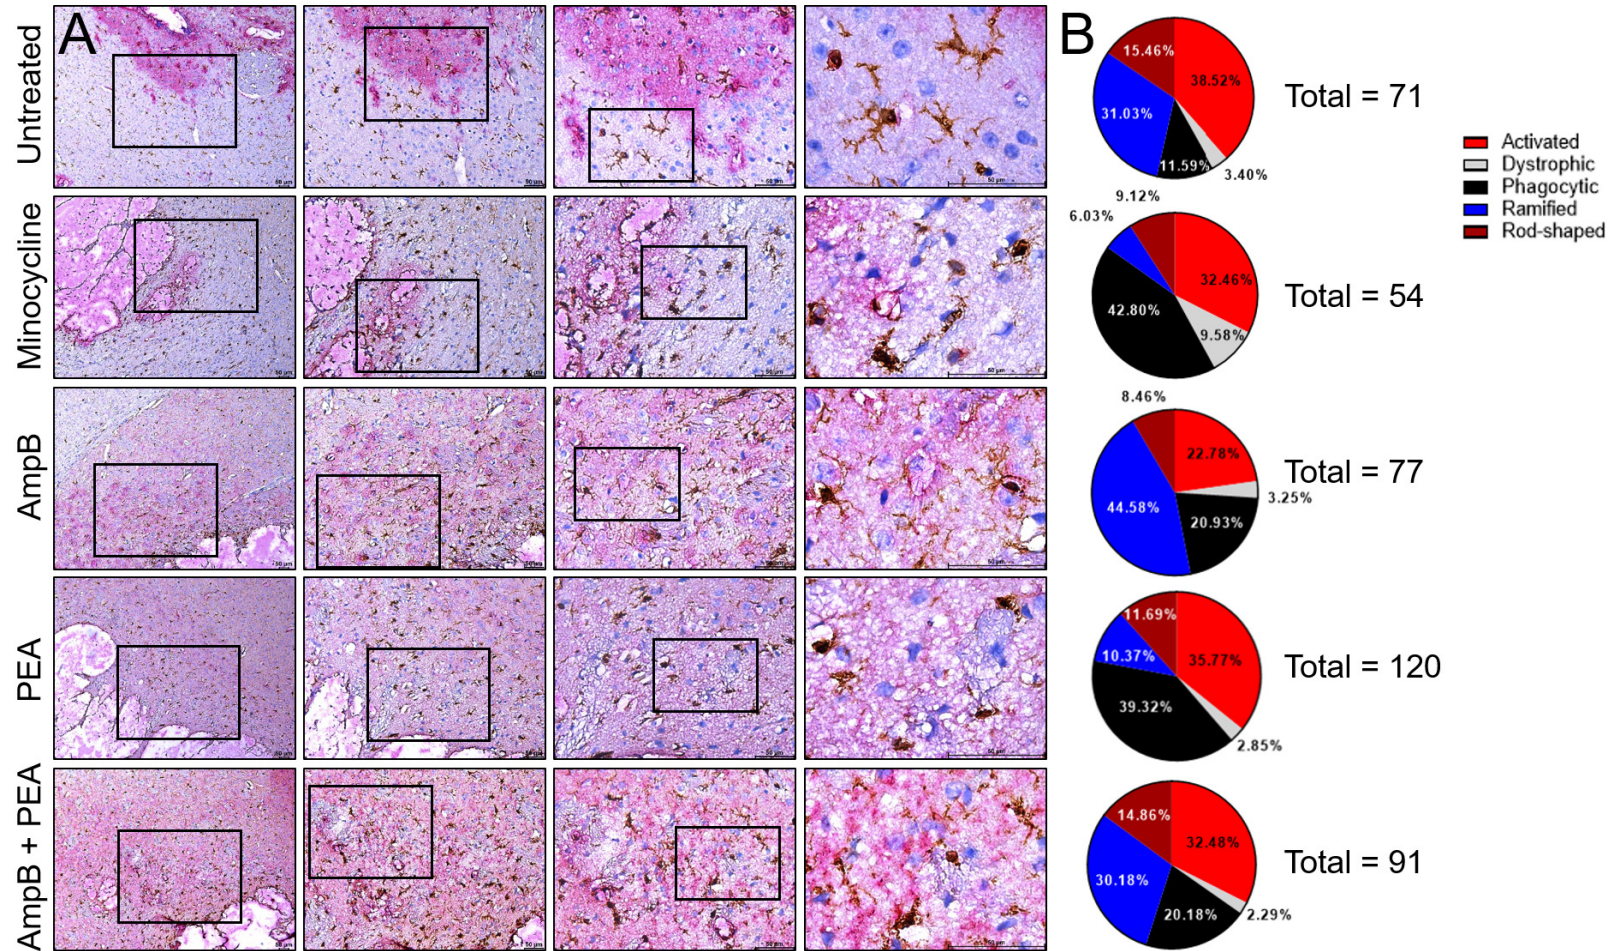

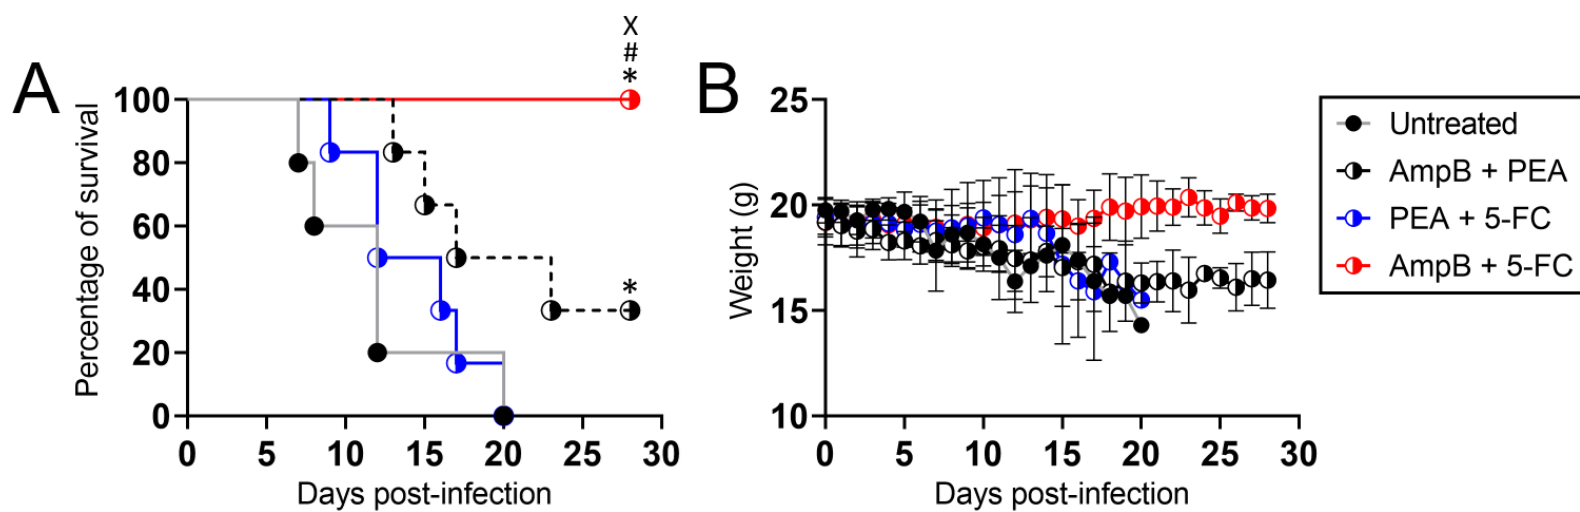

Source: https://www.biorxiv.org/content/10.1101/2023.04.10.536237v1.full.pdf
